# Supplementary material
Source: PubMed Central journal article supplement (PMC2656269)
Supplement: blood-2008-03-144121_1.pdf [file blood-2008-03-144121_1.pdf]

| <b>RT-PCR</b>         | <b>Sequence</b>                               |
|-----------------------|-----------------------------------------------|
| PARP-14 E8 Forward    | 5'- GGT CAC TAA AGA TCA TGA -3'               |
| PARP-14 E8 Reverse    | 5'- CCC ATG GTT ACT CTG TTT -3'               |
| Pim-1 Forward         | 5'- GAT CAT CAA GGG CCA AGT GT -3'            |
| Pim-1 Reverse         | 5'- GAT GGT TCC GGA TTT CTT CA -3'            |
| Pim-2 Forward         | 5'- TTG CGC TGC TGT GGA AGG TGG G -3'         |
| Pim-2 Reverse         | 5'- GGG AGA CAT GAG CAG GGA AGT G -3'         |
| HPRT Forward          | 5'- TGA AGA GCT ACT GTA ATG ATC AGT CAA C -3' |
| HPRT Reverse          | 5'- AGC AAG CTT GCA ACC TTA ACC A -3'         |
|                       |                                               |
| <b>PCR Genotyping</b> |                                               |
| PARP-14 Forward       | 5'- CCT GCC AGG CAG TTG TTC TG -3'            |
| PARP-14 Reverse       | 5'- AGG ATC TGA GGC CCT CTT CTG -3'           |
| LTR                   | 5'- ATA AAC CCT CTT GCA GTT GCA TC -3'        |
