# Supplementary material
Source: PubMed Central journal article supplement (PMC2656269)
Supplement: blood-2008-03-144121_2.pdf [file blood-2008-03-144121_2.pdf]

|                                                                         | WT                      | PARP-14 KO               |
|-------------------------------------------------------------------------|-------------------------|--------------------------|
| % of TCR <sup>hi</sup> <sup>a</sup>                                     | 9.4 ± 0.34 <sup>b</sup> | 12.2 ± 0.53 <sup>e</sup> |
| Number of TCR <sup>hi</sup> (×10 <sup>6</sup> ) <sup>a</sup>            | 13.4 ± 1.3 <sup>c</sup> | 14.9 ± 2.2 <sup>f</sup>  |
| % of CD44 <sup>hi</sup> among CD8 <sup>d</sup>                          | 25.5 ± 2.9 <sup>b</sup> | 33.4 ± 5.2 <sup>e</sup>  |
| Number of CD44 <sup>hi</sup> among CD8 (×10 <sup>6</sup> ) <sup>d</sup> | 2.0 ± 1.1 <sup>c</sup>  | 3.0 ± 1.6 <sup>f</sup>   |

a. Thymocytes were analyzed for TCR $\beta$  expression. % or number of TCR<sup>hi</sup> expressing cells were obtained from freshly isolated total thymocytes.

b. Data shown as mean ( $\pm$  SEM) % of cells from the five independent experiments.

c. Data shown as mean ( $\pm$  SEM) number of cells from the five independent experiments

d. Shown are % or number of CD44<sup>hi</sup> cells in CD8<sup>+</sup> gated splenocytes.

e. Significant difference between WT and PARP-14.  $p < 0.01$

f. Significant difference between WT and PARP-14.  $p < 0.05$
