# Supplementary material
Source: PubMed Central journal article supplement (PMC2656269)
Supplement: blood-2008-03-144121_3.pdf [file blood-2008-03-144121_3.pdf]

**Down-regulation : Repression by IL-4**

| PARP-14 KO <sup>b</sup>    | WT <sup>c</sup> | Gene name annotation             |
|----------------------------|-----------------|----------------------------------|
| 2810048G17Rik <sup>f</sup> |                 | EST (expressed sequence tag)     |
| Aldh2                      |                 | aldehyde dehydrogenase 2         |
| Apoe                       |                 | apolipoprotein E                 |
| Ccr6                       |                 | chemokine (C-C motif) receptor 6 |
| Ccr7                       |                 | chemokine (C-C motif) receptor 7 |
| Cst3                       |                 | cystatin C                       |
| ldb3                       |                 | inhibitor of DNA binding 3 (Id3) |
|                            | Ifi205          | interferon activated gene 205    |
| Lbh                        |                 | limb-bud and heart               |
| Ltb                        |                 | lymphotoxin B                    |
| Scml4                      |                 | sex comb on midleg-like 4        |

**Up-regulation : Induction by IL-4**

| PARP-14 KO <sup>d</sup> | WT <sup>e</sup> | Gene name annotation                             |
|-------------------------|-----------------|--------------------------------------------------|
|                         | Abcg1           | ATP-binding cassette/transport chemokine         |
| Ccl4                    |                 | chemokine-ligand 4                               |
| Hmgn3                   |                 | high mobility group nucleosomal binding domain 3 |
| Samsn1                  |                 | NM_023380 SAM domain                             |
| Serpina3g               |                 | serine (or cysteine) proteinase inhibitor        |
| Wars                    |                 | tryptophanyl-tRNA synthetase                     |
|                         | Wdfy2           | WD repeat and FYVE domain containing 2           |
| Xbp1                    |                 | X-box binding protein 1                          |
| Xcl1                    |                 | chemokine (C motif) ligand 1                     |

- a. Listed genes are reproducibly exhibited more than two-fold differences in expression.
- b. Genes exhibiting greater repression by IL-4 in WT B cells compared to PARP-14 KO.
- c. Greater repression by IL-4 in PARP-14 deficient B cells than in WT controls.
- d. Greater induction by IL-4 in WT B cells than PARP-14 KO's.
- e. Less induction by IL-4 in WT B cells than PARP-14 KO cells.
- f. GenBank accession name.
